# Supplementary material for: Cost-Effectiveness Analysis of Fluocinolone Acetonide Intravitreal (FAI) Implant for Chronic Noninfectious Uveitis Affecting the Posterior Segment of the Eye (NIU-PS) in China
Source: Springer Nature journal article supplement (doi:10.1007/s40123-024-00939-6), 2024-04-27
Supplement: MOESM1 [file 27024804]

## **Supplemental Material**

### **Title**

Cost-effectiveness analysis of Fluocinolone Acetonide Intravitreal (FAI) Implant for chronic noninfectious uveitis affecting the posterior segment of the eye (NIU-PS) in China

### **Authors**

Xin Mao<sup>1#</sup>, Zhanjing Dai<sup>1#</sup>, Jing Yang<sup>1</sup>, Yuhang Wu<sup>1</sup>, Fan Xie<sup>1</sup>, Yun Lu<sup>1</sup>, Jie Yu<sup>1</sup>, Feng Chang<sup>1\*</sup>, Yuqiong Lu<sup>1\*</sup>

<sup>#</sup>Xin Mao and Zhanjing Dai contributed equally to this study and shared the first authorship.

### **Author affiliations**

<sup>1</sup> School of International Pharmaceutical Business, China Pharmaceutical University, Nanjing 211198, China

### **Corresponding authors**

(\*These authors contribute as co-corresponding authors.)

\*Yuqiong Lu, luyuqiong96@foxmail.com, School of International Pharmaceutical Business, China Pharmaceutical University, Nanjing 211198, China.

\*Feng Chang, cpucf@163.com, School of International Pharmaceutical Business, China Pharmaceutical University, Nanjing 211198, China.

**There are five Supplementary Tables included in the Supplementary Information.**

**Supplementary Table S1.** Proportions of concomitant treatments over 6 months (13 cycles) within the FAI implant arm.

**Supplementary Table S2.** Unit cost and proportions of drugs in the LCP arm and concomitant treatments of the FAI implant arm.

**Supplementary Table S3.** Pre-surgery concomitant treatments.

**Supplementary Table S4.** Unit cost and frequency of examinations.

**Supplementary Table S5.** Unit cost and proportions of drugs in subsequent therapies.

**Supplementary Table S1. Proportions of concomitant treatments over 6 months  
(13 cycles) within the FAI implant arm <sup>a</sup>**

| <b>Time</b>          | <b>Systemic steroid (%)</b> | <b>Topical steroid eye drops (%)</b> | <b>Local steroid injections (%)</b> | <b>Immunosuppressive drugs (%)</b> | <b>Biologics (%)</b> |
|----------------------|-----------------------------|--------------------------------------|-------------------------------------|------------------------------------|----------------------|
| Baseline (cycle 1-2) | 45.31%                      | 43.44%                               | 52.38%                              | 40.63%                             | 12.50%               |
| Month 1 (cycle 2-7)  | 36.36%                      | 12.73%                               | 0.00%                               | 34.55%                             | 12.73%               |
| Month 3 (cycle 7-13) | 31.31%                      | 7.46%                                | 1.47%                               | 29.85%                             | 11.94%               |
| Month 6 (cycle 13-)  | 28.99%                      | 28.99%                               | 13.04%                              | 15.94%                             | 4.35%                |

<sup>a</sup> Source from the FAI Chinese real-world study

**Supplementary Table S2. Unit cost and proportions of drugs in the LCP arm and concomitant treatments of the FAI implant arm**

| Parameters <sup>a</sup>                                | Value               | Source | Proportion of patients <sup>a</sup> |
|--------------------------------------------------------|---------------------|--------|-------------------------------------|
| <b>Systemic steroid</b>                                |                     |        |                                     |
| Prednisone acetate tablets 5mg                         | \$0.01[¥0.08]       | MENET  | 69.57%                              |
| Methylprednisolone tablets 4mg                         | \$0.08[¥0.56]       |        | 34.78%                              |
| <b>Topical steroid eye drops</b>                       |                     |        |                                     |
| Prednisolone acetate eye drops 5ml                     | \$4.27[¥28.77]      | MENET  | 60.00%                              |
| Tobramycin dexamethasone eye ointment 3.5mg            | \$3.28[¥22.09]      |        | 25.00%                              |
| Tobramycin dexamethasone eye drops 5ml                 | \$1.44[¥9.71]       |        | 25.00%                              |
| Fluorometholone eye drops 5ml                          | \$2.00[¥13.48]      |        | 20.00%                              |
| <b>Local steroid injections</b>                        |                     |        |                                     |
| Triamcinolone acetonide injection 40mg                 | \$1.11[¥7.48]       | MENET  | 75.00%                              |
| Methylprednisolone sodium succinate for injection 40mg | \$1.49[¥10.07]      |        | 25.00%                              |
| <b>Immunosuppressive drugs</b>                         |                     |        |                                     |
| Ciclosporin capsules 25mg                              | \$0.53[¥3.60]       | MENET  | 45.83%                              |
| Methotrexate tablets 2.5mg                             | \$0.18[¥1.21]       |        | 37.50%                              |
| Tacrolimus capsules 1mg                                | \$1.93[¥13.00]      |        | 16.67%                              |
| Azathioprine tablets 50mg                              | \$0.16[¥1.07]       |        | 29.17%                              |
| Cyclophosphamide tablets 50mg                          | \$0.79[¥5.30]       |        | 8.33%                               |
| Mycophenolate mofetil tablets 500mg                    | \$2.02[¥13.65]      |        | 4.17%                               |
| Tofacitinib citrate tablets 5mg                        | \$1.52[¥10.28]      |        | 4.17%                               |
| <b>Biologics</b>                                       |                     |        |                                     |
| Infliximab for injection 100mg                         | \$215.53[¥1,452.70] | MENET  | 15.00%                              |
| Adalimumab solution for injection 40mg                 | \$153.54[¥1,034.86] |        | 85.00%                              |

<sup>a</sup> Source from the FAI Chinese real-world study

Note. When calculating the drug costs, the assumption was made that each eye drop was 0.05 ml, and each fingertip eye paste was 0.5 g (2.5 cm).

**Supplementary Table S3. Pre-surgery concomitant treatments**

| <b>Parameters<sup>a</sup></b>               | <b>Value</b>   | <b>Source</b> |
|---------------------------------------------|----------------|---------------|
| Proparacaine hydrochloride eye drops 15ml   | \$4.92[¥33.14] | MENET         |
| Levofloxacin hydrochloride eye drops 5ml    | \$2.67[¥18.00] |               |
| Tobramycin dexamethasone eye ointment 3.5mg | \$3.28[¥22.09] |               |
| Tropicamide phenylephrine eye drops 10ml    | \$5.11[¥34.43] |               |
| Povidone iodine solution 100ml              | \$1.35[¥9.10]  |               |
| Sodium chloride injection (0.9%) 100ml      | \$0.29[¥1.97]  |               |

<sup>a</sup> Source from the FAI Chinese real-world study

Note. Given that the pre-surgery treatments were single-use, the assumption was made that the costs of pre-surgery concomitant treatments were rounding up to a full vial size.

**Supplementary Table S4. Unit cost and frequency of examinations**

| The unit cost of examinations         |                  |                                                      | The frequency of examinations |           |                    |                  |
|---------------------------------------|------------------|------------------------------------------------------|-------------------------------|-----------|--------------------|------------------|
| Parameters                            | Value            | Source                                               | FAI implant <sup>a</sup>      |           |                    | LCP <sup>b</sup> |
|                                       |                  |                                                      | Cycle 0                       | Cycle 2/7 | Cycle 13/26/52/78- | Per cycle        |
| Outpatient (register)                 | \$2.78[¥18.77]   | Average prices of medical service items <sup>c</sup> | —                             | 1         | 1                  | 0.50             |
| Inpatient (bed fee)                   | \$8.25[¥55.61]   |                                                      | 1                             | —         | —                  | —                |
| HbA1c                                 | \$7.28[¥49.04]   |                                                      | 1                             | —         | —                  | —                |
| Blood routine                         | \$13.19[¥88.92]  |                                                      | 1                             | —         | —                  | 0.12             |
| Liver function tests                  | \$4.00[¥26.97]   |                                                      | 1                             | —         | —                  | 0.20             |
| Kidney function tests                 | \$6.71[¥45.20]   |                                                      | 1                             | —         | —                  | 0.20             |
| Four blood transfusion indices        | \$20.19[¥136.07] |                                                      | 1                             | —         | —                  | —                |
| Five coagulation indices              | \$16.39[¥110.47] |                                                      | 1                             | —         | —                  | —                |
| Five electrolyte indices              | \$4.48[¥30.22]   |                                                      | 1                             | —         | —                  | —                |
| hs-CRP test                           | \$5.46[¥36.78]   |                                                      | 1                             | —         | —                  | —                |
| ECG                                   | \$4.08[¥27.48]   |                                                      | 1                             | —         | —                  | —                |
| Computerized blood glucose monitoring | \$1.05[¥7.10]    |                                                      | 1                             | —         | —                  | —                |
| Blood oxygen saturation monitoring    | \$0.62[¥4.15]    |                                                      | 2                             | —         | —                  | —                |
| OCT (monocular)                       | \$22.88[¥154.20] |                                                      | 1                             | 1         | 1                  | 0.50             |
| OCT (binocular)                       | \$36.47[¥245.80] |                                                      | 1                             | 1         | 1                  | 0.50             |
| IOP                                   | \$1.80[¥12.10]   |                                                      | 1                             | 1         | 1                  | 0.45             |
| Slit-lamp examinations                | \$0.98[¥6.58]    |                                                      | 1                             | 1         | 1                  | 0.67             |

|                                   |                  |                             |   |   |   |      |
|-----------------------------------|------------------|-----------------------------|---|---|---|------|
| Fundus photography (monocular)    | \$3.74[¥25.20]   |                             | 1 | 1 | 1 | 0.40 |
| Fundus photography (binocular)    | \$5.34[¥36.00]   |                             | 1 | 1 | 1 | 0.40 |
| FFA (monocular)                   | \$22.37[¥150.80] |                             | 1 | — | 1 | 0.31 |
| FFA (binocular)                   | \$29.76[¥200.60] |                             | 1 | — | 1 | 0.31 |
| Routine visual acuity examination | \$0.37[¥2.48]    |                             | 1 | — | — | —    |
| B-ultrasound (eye)                | \$6.26[¥42.20]   |                             | — | — | — | 0.33 |
| BCVA                              | \$1.63[¥11.00]   | Expert surveys <sup>d</sup> | — | 1 | 1 | 0.50 |
| Dilated fundus examination        | \$2.00[¥13.50]   | Expert surveys <sup>d</sup> | — | 1 | 1 | 0.50 |

<sup>a</sup> Source from the FAI Chinese real-world study;

<sup>b</sup> Source from expert survey;

<sup>c</sup> The average prices of medical service items in five cities: Beijing, Wuhan, Chengdu, Guangzhou, and Zhenjiang;

<sup>d</sup> Expert surveys (10 experts from ophthalmology departments of tertiary care institutions in eight regions, including Guangdong, Zhejiang, and Hunan et al., of whom 90% were chief physicians).

Abbreviations: FAI: Fluocinolone Acetonide Intravitreal; LCP: limited current practice; HbA1c: Glycated hemoglobin; hs-CRP test: High-sensitivity C-reactive protein test; ECG: 12-Lead Electrocardiogram; OCT: Optical Coherence Tomography; IOP: Intraocular pressure; FFA: Fundus Fluorescence Angiography; BCVA: Best-Corrected Visual Acuity.

**Supplementary Table S5. Unit cost and proportions of drugs in subsequent therapies**

| Parameters <sup>a</sup>                            | Value              | Source | Proportion of patients <sup>a</sup> |
|----------------------------------------------------|--------------------|--------|-------------------------------------|
| Mycophenolate mofetil tablets 500mg                | \$2.02[¥13.65]     |        | 16.07%                              |
| Methotrexate tablets 2.5mg                         | \$0.18[¥1.21]      |        | 23.21%                              |
| Ciclosporin capsules 25mg                          | \$0.53[¥3.60]      |        | 30.36%                              |
| Azathioprine tablets 50mg                          | \$0.16[¥1.07]      |        | 8.93%                               |
| Prednisone acetate tablets 5mg                     | \$0.01[¥0.08]      |        | 75.00%                              |
| Calcium carbonate tablets 300mg                    | \$0.05[¥0.33]      |        | 32.14%                              |
| Potassium chloride sustained-release tablets 500mg | \$0.09[¥0.62]      |        | 19.64%                              |
| Adalimumab solution for injection 40mg             | \$153.54[¥1034.86] |        | 7.14%                               |
| Folic acid tablets 5mg                             | \$0.03[¥0.22]      |        | 14.29%                              |
| Colchicine tablets 0.5mg                           | \$0.05[¥0.33]      |        | 7.14%                               |
| Glutathione tablets 100mg                          | \$0.24[¥1.59]      |        | 1.79%                               |
| Methylprednisolone tablets 4mg                     | \$0.08[¥0.56]      |        | 1.79%                               |
| Prednisolone acetate eye drops 5ml                 | \$4.27[¥28.77]     |        | 60.71%                              |
| Atropine sulfate eye gel 2500mg                    | \$4.70[¥31.69]     |        | 12.50%                              |
| Fluorometholone eye drops 5ml                      | \$2.00[¥13.48]     |        | 39.29%                              |
| Bromfenac sodium eye drops 5ml                     | \$7.34[¥49.47]     | MENET  | 37.50%                              |
| Levofloxacin hydrochloride eye drops 5ml           | \$2.67[¥18.00]     |        | 1.79%                               |
| Carteolol hydrochloride eye drops 5ml              | \$2.90[¥19.54]     |        | 3.57%                               |
| Loteprednol etabonate ophthalmic suspension 5ml    | \$10.30[¥69.43]    |        | 7.14%                               |
| Tobramycin dexamethasone eye ointment 3.5mg        | \$3.28[¥22.09]     |        | 1.79%                               |
| Dextran and hypromellose eye drops 0.4ml           | \$0.40[¥2.70]      |        | 1.79%                               |
| Brinzolamide eye drops 5ml                         | \$8.95[¥60.32]     |        | 1.79%                               |
| Tobramycin dexamethasone eye drops 5ml             | \$1.44[¥9.71]      |        | 1.79%                               |
| Pranoprofen eye drops 5ml                          | \$4.51[¥30.42]     |        | 1.79%                               |
| Dexamethasone+ Triamcinolone+ Lidocaine            | —                  |        | 8.93%                               |
| Dexamethasone sodium phosphate injection 5mg       | \$1.09[¥7.33]      |        | —                                   |
| Triamcinolone acetonide injection 40mg             | \$1.11[¥7.48]      |        | —                                   |
| Lidocaine hydrochloride injection 5ml              | \$0.59[¥3.95]      |        | —                                   |
| Triamcinolone acetonide injection 40mg             | \$1.11[¥7.48]      |        | 21.43%                              |

<sup>a</sup> Source from the FAI Chinese real-world study



Note. When calculating the drug costs in subsequent therapy, the assumption was made that each eye drop was 0.05 ml, and each fingertip eye paste was 0.5 g (2.5 cm).
